# Supplementary material for: Fabrication of a vanadium nitride/N-doped carbon hollow nanosphere composite as an efficient electrode material for asymmetric supercapacitors
Source: Royal Society of Chemistry journal article supplement (doi:10.1039/d0na00288g), 2020-01-01
Supplement: d0na00288g1.pdf [file d0na00288g1.pdf]

## Supporting information

### **Fabrication of Vanadium Nitride/N-Doped Carbon Hollow Nanospheres Composite as an Efficient Electrode Material for Asymmetric Supercapacitors**

Xin Jiang<sup>‡a</sup>, Wei Lu<sup>‡a</sup>, Xiaodan Yu<sup>a</sup>, Shuyan Song<sup>b</sup> and Yan Xing<sup>a\*</sup>

<sup>a</sup> Jilin Provincial Key Laboratory of Advanced Energy Materials, Department of Chemistry, Northeast Normal University, Changchun 130024, PR China

<sup>b</sup> State Key Laboratory of Rare Earth Resource Utilization, Changchun Institute of Applied Chemistry Chinese Academy of Sciences, Changchun 130012, (P.R. China)

<sup>‡</sup> These authors contributed equally to this work.

Email: xingy202@nenu.edu.cn

## Experimental

### **1. Material characterization**

The crystal structures of all the obtained samples were identified by X-ray power diffraction (XRD, Smart Lab). The chemical composition of VN/NCS composite was tested on X-ray photoelectron spectroscope (XPS, ESCALAB 250). The morphologies of the as-synthesized samples were obtained from transmission electron microscopy (TEM, JEM-2100 F) and scanning electron microscope (SEM, HITACHI SU8010). Nitrogen absorption-desorption measurement was performed on a MT 3000 analyzer at 77.4 K.

---

## 2. Electrochemical measurements

The electrochemical properties of the as-prepared electrode materials were estimated by cyclic voltammetry (CV), galvanostatic charge-discharge (GCD) and the electrochemical impedance spectroscopy (EIS) on CHI660D workstation in a standard three-electrode system in a 2 M KOH electrolyte. Platinum sheet and Hg/HgO electrode were used as a counter electrode and a reference electrode, respectively. After coating the mixture paste of active material (80 wt.%), acetylene black (15 wt.%) and polyvinylidene difluoride (PVDF) (5 wt.%) on the nickel foam, the working electrode was dried for 12 h, and the loading mass of active material on the working electrode is about 2 mg.

The specific capacitance ( $C_s$ ) of the electrode material was assessed by equation (a), where  $I$  (A),  $\Delta t$  (s),  $\Delta V$  (V) and  $m$  (g) in the equation represent the discharge current, discharge time, operating potential window and mass of the active material, respectively. The coulombic efficiency is calculated by the equation (d), where  $t_c$  and  $t_d$  are the charge and discharge times, and  $\eta$  is the coulombic efficiency.

The capacitive contribution of the VN/NCS, NCS, and VN NWs electrodes is calculated by the equation (c), where  $i$ ,  $v$  are the current and the scan rate, respectively,  $a$  and  $b$  are constants. The detailed calculation process is given as follows:

In the case of EDLC and the diffusion-controlled process,  $b$  is equal to 1 and 0.5, respectively. Following this concept, we can divide the equation as:

$$i(V) = kv + k'v^{0.5}$$

where  $i$  is the current under a fixed voltage (V),  $k$  and  $k'$  are constants. By simply plotting the relationship between  $i$  and  $v^{0.5}$ , we can obtain the slope  $k$ . Finally, the capacitive contribution

---

of these samples is plotted and showed in Figure. 6 by calculating the  $k$  value at different voltages under different scan rates.

In addition, the energy density ( $E$ ) and the power density ( $P$ ) are utilized to evaluate the electrochemical properties of the  $V_2O_3/C//VN/NC$  ASC device according to equation (d) and (e), respectively, where  $C$  ( $F\ g^{-1}$ ) is the specific capacitance and  $\Delta V$  (V) is the operating potential window,  $\Delta t$  (s) is the discharge time.

$$C_s = I/m \times \Delta t / \Delta V \quad (a)$$

$$\eta = t_c / t_d \quad (b)$$

$$i = a v^b \quad (c)$$

$$E = 0.5 \times C \times \Delta V^2 \quad (d)$$

$$P = E / \Delta t \quad (e)$$

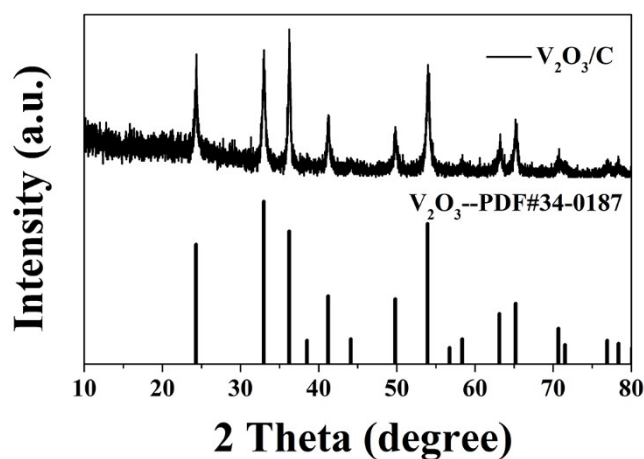

Figure S1. XRD pattern of  $V_2O_3/C$  nanocomposite.

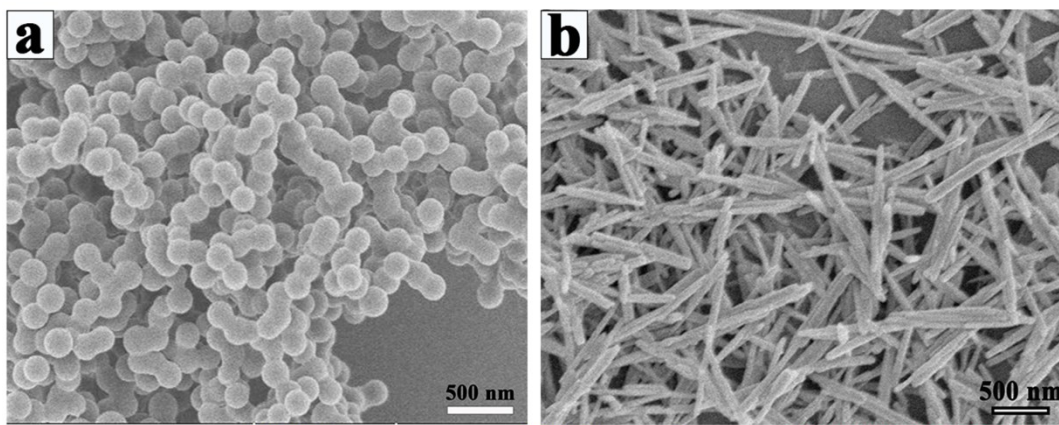

**Figure S2.** SEM images of (a) NCS and (b) VN NWs.

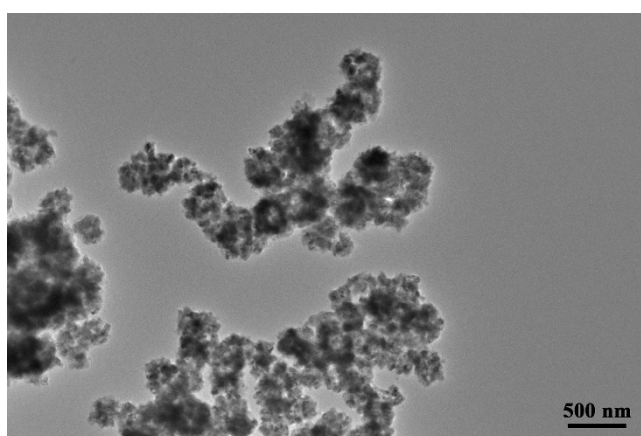

**Figure S3.** TEM image of  $V_2O_3/C$  composite.

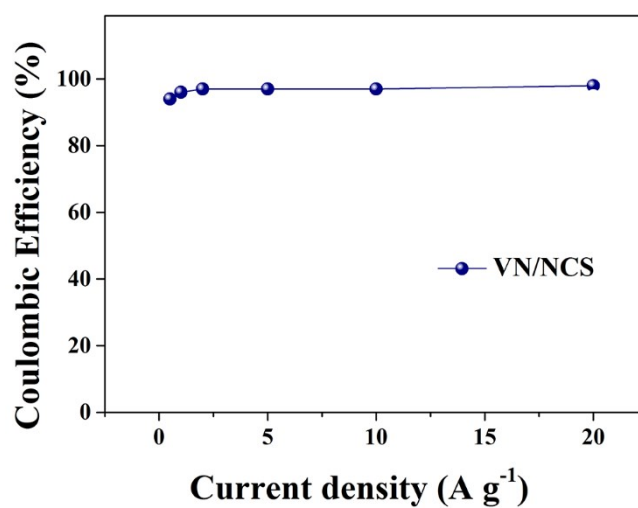

**Figure S4.** The coulombic efficiency of VN/NCS electrode at the various current densities (0.5-20  $A\ g^{-1}$ ).

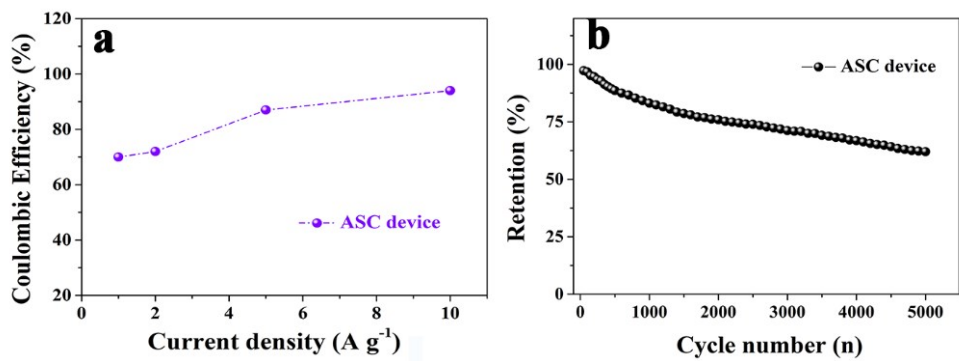

**Figure S5.** (a) Coulombic efficiency of the ASC device at the current density of 1-10 A g<sup>-1</sup>, (b)

Long-term cycling stability of the assembled ASC device at a current density of 5 A g<sup>-1</sup>.

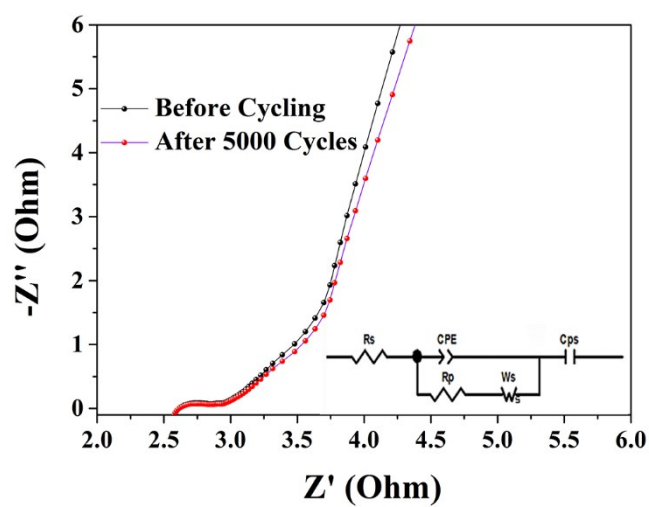

**Figure S6.** Nyquist plots of the ASC device before and after 5000 cycles.
